## From random to predictive: a context-specific interaction framework improves selection of drug protein-protein interactions for unknown drug pathways

Jennifer L. Wilson<sup>1\*</sup>, Alessio Gravina<sup>2</sup>, Kevin Grimes<sup>1</sup>

<sup>1</sup> Department of Chemical and Systems Biology, Stanford University, Stanford CA, USA.

<sup>2</sup> Department of Computer Science, University of Pisa, Pisa, Italy.

\* To whom correspondence should be addressed: wilsonjl@stanford.edu

### Abstract

With high drug attrition, interaction network methods are increasingly attractive as quick and inexpensive methods for prediction of drug safety and efficacy effects when a drug pathway is unknown. However, these methods suffer from high false positive rates for selecting drug phenotypic effects, their performance is often no better than random (AUROC ~0.5), and this limits the use of network methods in regulatory and industrial decision making. In contrast to many network engineering approaches that apply mathematical thresholds to discover phenotype associations, we hypothesized that interaction networks associated with true positive drug phenotypes are context specific. We tested this hypothesis on 16 designated medical event (DMEs) phenotypes which are a subset of adverse events that are of utmost concern to FDA review using a novel data set extracted from drug labels. We demonstrated that context-specific interactions (CSIs) distinguished true from false positive DMEs with a 50% improvement over non-context-specific approaches (AUROC 0.77 compared to 0.51). By reducing false positives, CSI analysis has the potential to advance network techniques to influence decision making in regulatory and industry settings.

### Author summary

Drugs bind proteins that interact with multiple downstream proteins and these protein networks are responsible for drug efficacy and safety. Protein interaction network methods predict drug effects aggregating information about proteins around drug-binding protein targets. However, many frameworks exist for identifying proteins relevant to a drug's effect. We consider three frameworks for selecting these proteins and show increased performance from a context-specific approach on selecting proteins relevant to severe drug side effects. The context-specific approach leverages the idea that the proteins responsible for a drug side effect are specific to each side-effect. By discovering the relevant proteins, we can better understand downstream effects of drugs and better anticipate drug side effects for new drugs in development. Further, we focus on

32 designated medical events, a subset of the most severe drug side-effects that are high priority for regulatory  
33 review.

## 35 **Introduction**

36 Protein interaction network methods are increasingly attractive for understanding drug  
37 pharmacodynamic effects because these methods are high-throughput and inexpensive relative to  
38 experimental techniques and because they consider drug effects beyond the drug's targets. Pathways analysis  
39 is a valuable tool for understanding a drug's downstream effects. Yet, curated pathways do not exist for drugs  
40 in development and drug pathways do not cleanly align with curated pathways, further necessitating rapid and  
41 reliable tools for generating potential pathway mechanisms. To draft these pathways, many have applied  
42 network methods for understanding associations between drug target proteins and safety or efficacy  
43 phenotypes and extensions of these models have predicted drug repurposing opportunities(1,2) and synergies  
44 for drug combinations(3,4). These methods are compelling because a network approach may yield statistically  
45 significant associations for a drug's protein targets to many more phenotypic associations than validated  
46 evidence exists. Due to financial or market competition, a drug may only be approved for one, maybe two  
47 disease indications, yet a network method might predict statistically significant associations to many more  
48 disease indications. These predictions may be opportunities for re-purposing or using drugs off-label yet  
49 distinguishing between true positives and true negative disease associations remains a challenge, and gold  
50 standard sets of drug effects do not exist(5).

51 The network community has applied multiple techniques for selecting between true positive and true  
52 negative drug phenotypes, each with varying advantages and disadvantages. In an over-simplified view,  
53 distance-based methods identify the number of protein-protein interactions to reach a relevant phenotype  
54 association by calibrating to the distance between protein targets of marketed drugs and their intend-to-treat  
55 disease genes(1,6,7). Statistical enrichment methods look for enrichment of a network's genes relative to all  
56 gene associations across the entire interactome(2) and some rank drug phenotypes based on the connectivity  
57 and closeness of phenotypes shared by drug combinations(8). Neural network methods can achieve high  
58 accuracy at labeling known drug-drug interactions using protein-protein interaction networks, drug-target  
59 binding data, and gene/protein-phenotype data<sup>4</sup>. However, parsing the potential mechanism behind these

60 predictions remains challenging. Here we compared three different paradigms for separating true positive and  
61 true negative drug safety phenotypes to better understand the utility of these paradigms for selecting relevant  
62 drug phenotypes.

63 We specifically considered network associations to drug side-effects because unintended drug side-  
64 effects are a major contributor to drug attrition and many applications of network methods have successfully  
65 identified drug associations to safety phenotypes. We specifically focused on designated medical events  
66 (DMEs) because these are the most severe and are consistently and rigorously considered during regulatory  
67 review (e.g. myocardial infarction, pancreatitis) and we did not consider “milder” adverse events (e.g. nausea,  
68 rash). By focusing on this subset of adverse events, we reasoned that FDA regulatory review was a sufficiently  
69 stringent filter for identifying a true association between a drug and a DME and that a lack of a labeled warning  
70 was a sufficient criterion for determining that a drug is *likely* not causative for the DME. Using this assumption,  
71 we used a novel data set of positives extracted from drug labels using a natural language processing approach  
72 (publication forthcoming). This yielded a set of 1,136 drugs associated to 35 designated medical events  
73 (DMEs), a severe subset of drug side-effects. This dataset was originally developed and analyzed to  
74 understand patterns in networks of drugs with similar DME associations. However, the dataset provided a  
75 unique opportunity to assess the performance of network selection paradigms for identifying relevant drug  
76 safety phenotypes using protein-protein interactions. In this dataset, we defined negatives as any of the 1,136  
77 drugs that had network associations to this set of DMEs but the DME was not listed on the drug’s label. We  
78 further applied the PathFX algorithm(2) because we could more easily modify the code base to test different  
79 paradigms for separating true positives and true negatives.

## 81 **Results**

### 82 *Statistical enrichment cannot clearly separate true positives and true negatives*

83 We first investigated a statistical enrichment method (**Figure 1A**) for separating true positives and true  
84 negatives. Specifically, we used PathFX in its original published form. Briefly, PathFX uses a drug’s binding  
85 proteins as inputs to identify a network of relevant protein-protein interactions from a larger interactome  
86 network (**Supplemental Figure 1**). The algorithm uses a database of gene-phenotype associations and  
87 statistical enrichment to identify enriched network phenotypes relative to the original interactome. We used

88 PathFX to identify networks for all 1,136 drugs and investigated where PathFX identified a true positive – a  
89 network association between a drug and a DME on the drug’s label – and a false positive – a network  
90 association to a DME not listed on the drug label. The distributions for these p-values, both raw and  
91 normalized, overlap (**Supplemental Figure 2**), suggesting that a simple statistical test of enrichment is  
92 insufficient for separating true positives and true negatives. Not surprisingly, the area under the receiver  
93 operator curve (AUROC) is 0.51 (**Figure 1C**).

#### 94 *Using a distance-based approach does not increase model performance for DMEs*

95 We next investigated a simple distance metric for separating true and false positives (**Figure 1A**). For  
96 this investigation, we modified PathFX from the original published form (**Supplemental Figure 1**). Specifically,  
97 the original PathFX algorithm relied on an empirically derived path-score threshold to minimize common biases  
98 for network algorithms including hub-bias (a gene/protein has high connectivity because it is well studied) and  
99 annotation bias (a phenotype is associated with many network genes/proteins because it is overly studied). We  
100 considered this path score to be a sufficient proxy for interaction path distance, and so we created modified  
101 versions of PathFX using non-optimal distances (e.g. PathFX\_dist0.9, PathFX\_dist0.8, etc). We reanalyzed our  
102 1,136 drug set using each of these distance algorithms and investigated how relaxing the path score value  
103 affected true and false positive rates. At distances of 0.82-0.99, we were unable to generate a full ROC curve(  
104 **Figure 1C**). This is likely due to the fact that increasing interaction path distance can only yield more true  
105 positives if there are more genes associated with the DME phenotype of interest. We discovered that modifying  
106 the path score threshold did not increase an ability to detect true positive associations to DME-associated  
107 genes.

#### 108 *Context-specific interactions increase ability to discern true from false positive DME associations*

109 Much of biology is context dependent and many pathways investigations have used disease-specific  
110 pathways to uncover target candidates for therapeutic interventions. We hypothesized that each DME may  
111 result from association to a DME-specific pathway and that a better separator of true and false positives could  
112 be the specific network genes/proteins supporting an association to a DME phenotype. To test this hypothesis,  
113 we tested multiple machine learning and multivariate approaches to distinguish network proteins associated  
114  
115

116 with true positives and true negatives for each DME phenotype. We performed nested cross-validation to  
117 select among random forests, logistic regression, and decision trees and used the F1 statistic to discover that  
118 these methods were comparable in performance (**Figure 1A, Supplemental Figure 3, Supplemental Table**  
119 **1**). We selected a simple linear regression because it was the most straightforward method for interpreting if  
120 and how network genes/proteins were associated with each DME of interest. Indeed, using a linear regression  
121 model combined with networks discovered for DME-associated drugs increased AUROC values 50%  
122 improvement over p-value (AUROC 0.77 compared to 0.51) or distance methods (**Figure 1C**). Performance  
123 varied for each DME because a separate logistic regression model was required for each DME phenotype  
124 (**Supplemental Figure 4**).

125 CSIs are further attractive for their interpretability. For instance, linear regression feature importance  
126 scores highlight network proteins – both drug-binding and downstream of drug-binding proteins – that are  
127 associated with positive and negative drugs for each DME (example for edema shown in **Figure 2**, other  
128 feature importance scores in **Supplemental File 1**). We overlaid feature importance scores on a merged  
129 network for edema to visualize the feature-importance scores in the context of drug protein-protein interaction  
130 networks (**Figure 4**). In the tabular results and merged network image, both drug-binding and downstream  
131 networked intermediate proteins have high feature importance scores, suggesting that downstream  
132 interactions (in addition to specific drug-binding targets) could contribute to drug-induced DMEs.

## 133 134 **Discussion**

135 Protein-protein interaction network methods are increasingly used for identifying phenotypes associated  
136 with drug-binding proteins, however, network methods are not sufficiently validated to have translational  
137 impact. Here we considered different network selection paradigms for their ability to discern true from false  
138 positive drug associations to designated medical events (DMEs). Statistical enrichment is a tractable and  
139 relatively easy method to implement, because it requires the selection of a p-value threshold for considering a  
140 phenotype as “positive”. However, we discovered that statistical enrichment was unable to separate true  
141 positives from true negatives. Distance-based metrics are another attractive, and easily implemented approach  
142 for discovering associations between a drug’s targets and DME-associated genes. However, we were unable

143 to universally apply a distance-based metric that correctly identified true positives without increase false  
144 positives. Further, interaction distances at high path score thresholds include little to no downstream  
145 interactions in the network and these truncated networks can be considered synonymous with only analyzing  
146 the drug's targets. An inability to detect DME associations using only drug targets further motivates the use of  
147 network methods for DME detection. We discovered that multivariate and machine learning techniques –  
148 specifically a simple logistic regression model – could identify network proteins for each DME and these  
149 interaction-based classifiers could separate true positives and true negatives across DMEs. To build further  
150 validation and support for network methods to be used more broadly in drug discovery, our results emphasize  
151 the importance of leveraging a context-specific paradigm. Indeed, the main contribution of this work is  
152 advancing the paradigm of context-specific analysis and emphasizing the role that context-specific interaction  
153 “mining” could have for making protein network methods have greater utility in industrial and regulatory  
154 decision making.

155         The relative success of CSI-mining is not entirely surprising given that disease-specific pathway  
156 investigations have successfully identified candidate therapeutic targets, however, the results highlight several  
157 hypotheses related to advancing network methods to have greater translational impact. In this analysis of  
158 DME-associated pathways, it was possible that DME positive and negative drugs converged on the same  
159 pathway proteins but had different effects on pathway activation or deactivation. For instance, convergence on  
160 the p53 signaling pathway can have both aggravating or mitigating effects on cancer growth depending on the  
161 directionality of effect on p53. The superior performance of CSIs suggests that the DME context is important  
162 for identifying relevant phenotypes and further, that DME effects could arise, at least partially, from distinct  
163 parts of the network – DMEs may arise not from convergence on key network proteins but may arise because  
164 of associations to distinct network proteins. Specifically, in the case of edema, our analysis identified  
165 endothelin-1 (EDN1) as having a high feature importance score for predicting drugs associated with edema on  
166 their labels and EDN1 was not drug binding. In contrast to the p53 example, this highlights a potential  
167 downstream signaling effect that could be common to drugs that induce edema. However, further experimental  
168 validation would be needed to confirm the relevance of EDN1 or any of the intermediate proteins with high  
169 feature importance scores. Across DMEs, we discovered many downstream network proteins, such as EDN1,  
170 with high feature importance scores. This further motivates the need to discover and test pathway mechanisms

171 for their role in DME effects in addition to scrutinizing the drug's direct binding targets. However, the evidence  
172 is compelling that context-specific interactions are a complementary and viable paradigm for advancing  
173 network methods to have greater influence on decision making in industry and regulatory settings.

174 We acknowledge limitations in this analysis. For instance, the definition of a set of gold-standard true  
175 negative examples is imperfect. We considered the lack of a warning on a drug's label as a sufficient standard  
176 for our analysis, considering the rigor and integrity of the FDA review process. Yet, it's still possible that some  
177 of our true negatives are false negatives and the negative drugs could have a meaningful association to a DME  
178 despite a lack of a labeled warning. Because defining gold standard true negatives is difficult, our analysis is  
179 limited to the investigation of DMEs and does not consider drug efficacy or milder drug side effects.

180 Understanding how well interaction pathways associate drug targets to efficacy phenotypes would require  
181 greater transparency about 'failed' tests of drugs against multiple diseases and better curation of this type of  
182 data. Further, the current definitions of CSIs could be further optimized. For some DME contexts, we achieved  
183 AUROC values that were much higher than p-value or distance-based metrics. For some DME contexts, we  
184 were unable to build sufficiently predictive models and ultimately restricted analysis to DMEs where we had at  
185 least 10 positive and negative examples. These models could be improved by further curation of positive and  
186 negative examples or the inclusion of more data (e.g. drug-protein binding data, gene-DME associations, or  
187 protein-protein interactions).

188 Further advancement of context-specific network analysis will require a sufficient number of known  
189 effectors. Specifically, to associate a drug with a relevant effect on a DME, we needed several examples of  
190 drugs that cause the DME and drugs that had network associations to the DME but did not cause it. Because  
191 we lack these positive and negative examples for understudied diseases without current therapies, we are  
192 unable to sufficiently predict drug effects on these understudied diseases. In the case of DMEs, sufficient drug  
193 effectors existed for training classifiers, making context-specific analysis feasible for classifying the effects of  
194 new compounds on DMEs. We anticipate that data from established assays and model systems will be  
195 essential to mining CSIs for drug-efficacy related phenotypes, especially for disease areas where successful  
196 therapies do not yet exist. We anticipate that network selection methods relying on mathematical principles  
197 (e.g. p-value selection, network distance, network connectivity) will remain as powerful workhorse techniques,  
198 especially in contexts where known drug effectors are not established. We see CSI mining as a means to

199 advance these predictions towards the goal of providing predictive power for decision-making at the level or  
200 regulatory review or industrial selection of gene targets for new therapies.

201 The contribution in this work is the demonstration that prioritizing specific subsets of the interaction  
202 network can be predictive for modeling drug effects. From a network engineering perspective, CSI mining may  
203 indeed affect how network methods are developed for understanding drug mechanisms. The result presented  
204 here encouraged us to pursue further validation of the prioritized network proteins as mediators of drug  
205 mechanisms. Indeed, combination drugs that bind DME-network proteins synergized to affect adverse  
206 outcomes associated with drugs associated with the DME on their drug labels (in preparation). Together, these  
207 results suggest a paradigm shift towards network engineering of context-specific pathways to identify drug  
208 network mechanisms.

## 209

## 210 **Materials and Methods**

### 211 *Extracting true positive and true negative drug examples from drug labels*

212 We extracted relevant phenotypes from the drug's labels using a custom NLP query (publication  
213 forthcoming, data included in *Drugs\_labeled\_for\_AEs.txt*). We further refer to 'positive drug examples' as those  
214 drugs associated with a DME on their drug label. We refer to 'negative drug examples' as any of the 1,136  
215 drugs in our drug set that do not have a DME listed on their drug label. We define positives and negatives for  
216 each DME separately. For instance, 496 drugs are associated with myocardial infarction on their drug label,  
217 and these drugs are considered positives for the myocardial infarction DMEs. The remaining 640 drugs in our  
218 1,136 drug set are considered negatives for the myocardial infarction DME.

### 219

### 220 *Modeling true positive and negative networks with PathFX*

221 We analyzed 1,136 drugs using PathFX with default parameter settings. Briefly, PathFX uses drug-  
222 binding proteins as inputs to first identify a relevant protein-protein interaction network around these targets,  
223 and second uses the full list of network genes/proteins to identify phenotypes associated with these  
224 genes/proteins relative to the entire interactome. For each drug, PathFX analysis yielded interaction networks  
225 and a list of phenotypes associated with these networks. For a full list of features and outputs, see<sup>2,9</sup>.



226 We assessed whether a phenotype matched a DME from the drug label and considered these pairs as  
227 true positives. We also searched these same association tables for DMEs not listed on the drug's label and  
228 considered these as false positives. The script *define\_tp\_fp.py* creates the following outputs:

229 *drugs\_to\_dmes\_true\_positive.txt*, *drugs\_to\_dmes\_false\_positives.txt*.

### 231 *Plotting p-value distributions and estimating AUROC values*

232 In the same script (*define\_tp\_fp.py*) where we defined our true and false positive examples, we  
233 generated plot of the p-values for these associations. This script generates the plots, *raw\_pvalues.png*, and  
234 *norm\_pvalues.png*, and generates the data object, *pvalue\_roc\_values.pkl*, for further analysis. We analyzed  
235 the AUROC in the script, *plot\_ROC\_pv\_soDist.py*, using the trapez method implemented in Python.

### 237 *Measuring the effect of interactome distance on detecting DME associations*

238 We developed modified versions of PathFX to test the effect of altering interaction distance on  
239 detecting associations to DMEs. For the original PathFX construction we empirically derived an interaction  
240 score threshold to prevent hub bias(2). To measure the effect of interactome distance on detecting  
241 associations, we created 11 custom versions of PathFX. These scripts are contained in the  
242 *PathFX\_soDist/scripts/* directory and are named *phenotype\_enrichment\_pathway\_so\_dist\_0.82.py* where  
243 '0.82' represents the score threshold used in this version. The other score thresholds used include 0.82-0.90,  
244 0.95, and 0.99. We used these thresholds out of convenience. We started our experiment using a stringent,  
245 high threshold, and then relaxed this threshold to increasingly allow more edges to be considered in network  
246 construction. Given the score distribution of our interaction network, we found that computational time  
247 increased significantly as we reached the 0.82 range. We truncated the analysis with this version because we  
248 saw that we were no longer drastically changing our ability to detect more true positives.

249 We created networks for our 1,136 drug set using each version using the script  
250 *run\_pathfx\_all\_distances.py*. This script generated networks, and association files for all 1,136 drugs at each of  
251 the 11 distances. We investigated whether the networks for these drugs contained associations to true or false  
252 positive DMEs at each score threshold. We analyzed these results using the script, *count\_tp\_fp\_so\_dist.py*,  
253 and the results of this script are saved in the *PathFX\_soDist/results/analyze\_so\_dists/* directory. We then used

254 the *plot\_ROC\_pv\_soDist.py* to count the true and false positive rates at each score threshold and plot the ROC  
255 curve using these values. This script generates the *pvalue\_ROC\_dist.png* figure.

### 257 *Logistic regression, decision trees, and random forests analysis*

258 For this analysis, we created binary matrices for all true and false positive networks associated with a  
259 DME. These matrices included a 1/0 if a gene was/was not included in the drug's network respectively. Rows  
260 were labels as positive if the drug's label included the DME on the label or negative if the drug's label was not  
261 associated with the DME. This analysis is included in the script *create\_positive\_negative\_files.ipynb* and this  
262 analysis yielded a matrix file for each of 24 DMEs: agranulocytosis, cardiac arrest, cerebral infarction, deep  
263 vein thrombosis, delirium, edema, gastric ulcer, hemolytic anemia, hemorrhage, hepatic necrosis,  
264 hyperlipidemia, hypertension, interstitial lung disease, myocardial infarction, myopathy, pancreatitis, peripheral  
265 neuropathy, pneumonia, proteinuria, pulmonary edema, sepsis, tardive dyskinesia, thrombocytopenia, and  
266 ventricular tachycardia. These files are saved in */ML\_network\_positives\_negatives/dme\_DMENAME.txt* where  
267 DMENAME is replaced with each of the DMES of interest.

268 We first used the scikit-learn module in python and a nested cross-validation procedure to evaluate  
269 modeling types – logistic regression, decision trees, and random forest – and used the F1 score to evaluate  
270 model performance in this analysis (*ML\_network\_positives\_negatives/run\_all\_dme\_models\_ncv.py*). The  
271 results of those analysis are included in **Supplementary Figure 1**. To generate test scores for the ROC curves  
272 using logistic regression, we modified *ML\_network\_positives\_negatives/run\_all\_dme\_models\_new\_log\_reg.py*  
273 and *ML\_network\_positives\_negatives/all\_pathways.py* scripts. To plot all ROC curves, we used  
274 *plot\_ROC\_all\_methods\_072720.py*.

### 276 *Plotting merged networks*

277 To analyze feature importance scores, we used  
278 *ML\_network\_positives\_negatives/save\_and\_plot\_feat\_imp\_scores.py*. This script analyzed the feature  
279 importance scores generated after the model fitting and generated **Supplemental File 1**. This file is a copy of  
280 *ML\_network\_positives\_negatives/log\_reg/logistic\_regression\_all\_feature\_importance.xlsx*. We next plotted  
281 merged networks and feature importance values using *network\_images/plot\_feat\_imp\_on\_networks.ipynb*.

282

### 283 *Data and code availability*

284 The data and code used in this analysis are available on GitHub

285 ([https://github.com/jenwilson521/network\\_selection](https://github.com/jenwilson521/network_selection)).

286

### 287 **Acknowledgements**

288 JLW was partially and AG and KG were supported by the SPARK program at Stanford. JLW was also  
289 supported by a Sanofi iDEA Award.

### 290 **Author Contributions**

291 JLW conceived of the idea. JLW and AG conducted the analysis. JLW wrote the manuscript. JLW, AG, and KG  
292 revised the manuscript.

### 293 **References**

- 294 1. Guney E, Menche J, Vidal M, Barabási A-L. Network-based in silico drug efficacy screening. *Nat*  
295 *Commun.* 2016 Feb 1;7(1):10331.
- 296 2. Wilson JL, Racz R, Liu T, Adeniyi O, Sun J, Ramamoorthy A, et al. PathFX provides mechanistic insights  
297 into drug efficacy and safety for regulatory review and therapeutic development. *PLoS Comput Biol.* 2018  
298 Dec 7;14(12):e1006614–27.
- 299 3. Yoo S, Noh K, Shin M, Park J, Lee K-H, Nam H, et al. In silico profiling of systemic effects of drugs to  
300 predict unexpected interactions. *Scientific Reports.* 2018 Jan 25;8(1):1612.
- 301 4. Zitnik M, Agrawal M, Leskovec J. Modeling polypharmacy side effects with graph convolutional networks.  
302 *Bioinformatics.* 2018 Jul 1;34(13):i457–66.
- 303 5. Harpaz R, Odgers D, Gaskin G, DuMouchel W, Winnenburger R, Bodenreider O, et al. A time-indexed  
304 reference standard of adverse drug reactions. *Scientific Data.* 2014 Nov 11;1(1):140043–10.
- 305 6. Aguirre-Plans J, Piñero J, Menche J, Sanz F, Furlong L, Schmidt H, et al. Proximal Pathway Enrichment  
306 Analysis for Targeting Comorbid Diseases via Network Endopharmacology. *Pharmaceuticals.* 2018  
307 Sep;11(3):61–18.
- 308 7. Cheng F, Kovács IA, Barabási A-L. Network-based prediction of drug combinations. *Nat Commun.* 2019  
309 Mar 13;10(1):1–11.
- 310 8. Sanders JM, Beshore DC, Culberson JC, Fells JI, Imbriglio JE, Gunaydin H, et al. Informing the Selection  
311 of Screening Hit Series with in Silico Absorption, Distribution, Metabolism, Excretion, and Toxicity Profiles.  
312 *J Med Chem.* 2017 Aug 24;60(16):6771–80.

313

314

315

316

317

**A** 1. Statistical enrichment: compare drug network to interactome

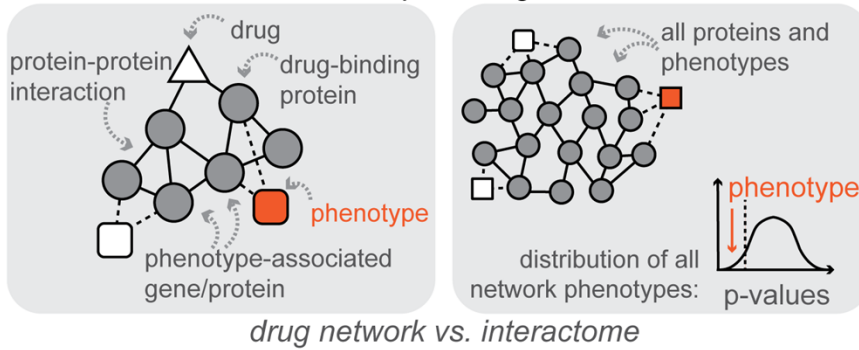

2. Distance based: constrain associations based on distance function

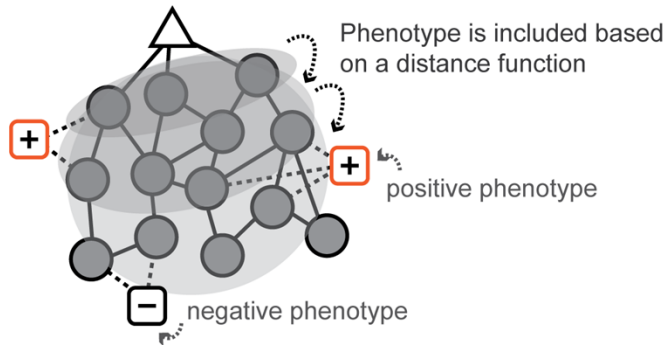

3. Context-specific interactions: identify network genes per phenotype

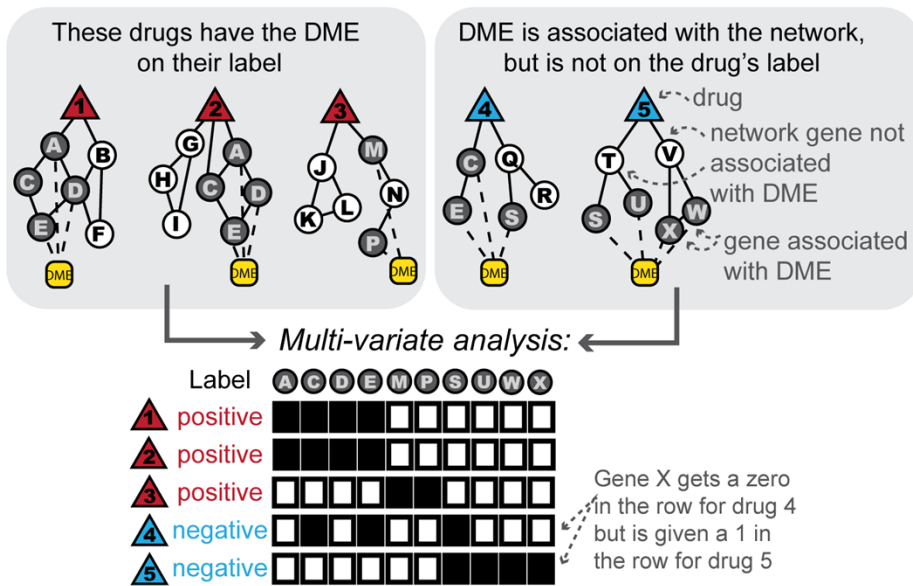

**B** Data of positive and negative drug associations are taken from labels

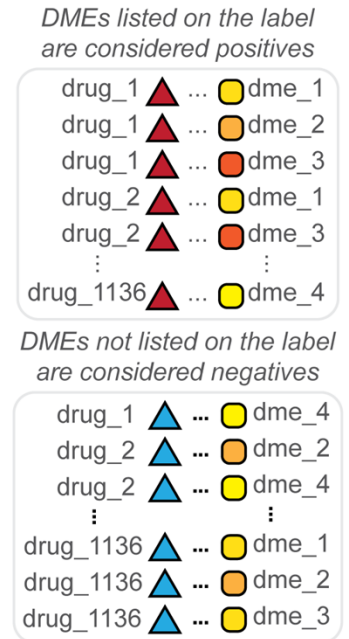

**C** Performance of three frameworks as measured by AUROC

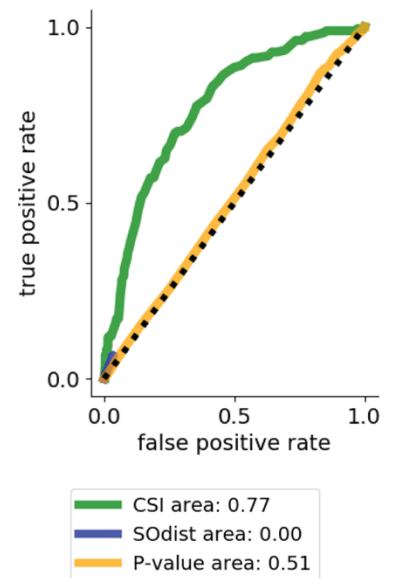

321 **Figure 1. Consideration of three frameworks shows superior performance of context-specific analysis.**

322 **(A)** We considered three frameworks: 1. statistical enrichment - a network association is selected if the drug's  
323 interaction network is enriched for associations to a phenotype of interest relative to the entire interactome. 2.  
324 distance-based - an interaction distance function is calibrated based on the ability to identify relationships to  
325 true positive phenotypes without finding associations to true negative phenotypes. 3. context-specific  
326 interactions (CSI) analysis – multivariate analysis (e.g. logistic regression) is used to discover which  
327 genes/proteins and interactions separate true from false positives. **(B)** Positive Drug-DME relationships are  
328 extracted from the warnings, boxed warnings, and precautions section of the drug's label. Negative cases (or  
329 cases where the drug is not expected to cause the DME) are inferred from the absence of the DME on the  
330 drug's label. Red or blue triangles represent positive or negative drugs, and multiple shades of yellow/orange  
331 are meant to distinguish different DMEs in the dataset. **(C)** ROC curves for distinguishing true and false  
332 positives using p-value (orange) or a distance-based approach (blue) or using CSIs (green). Legend indicates  
333 AUROC value for each framework.

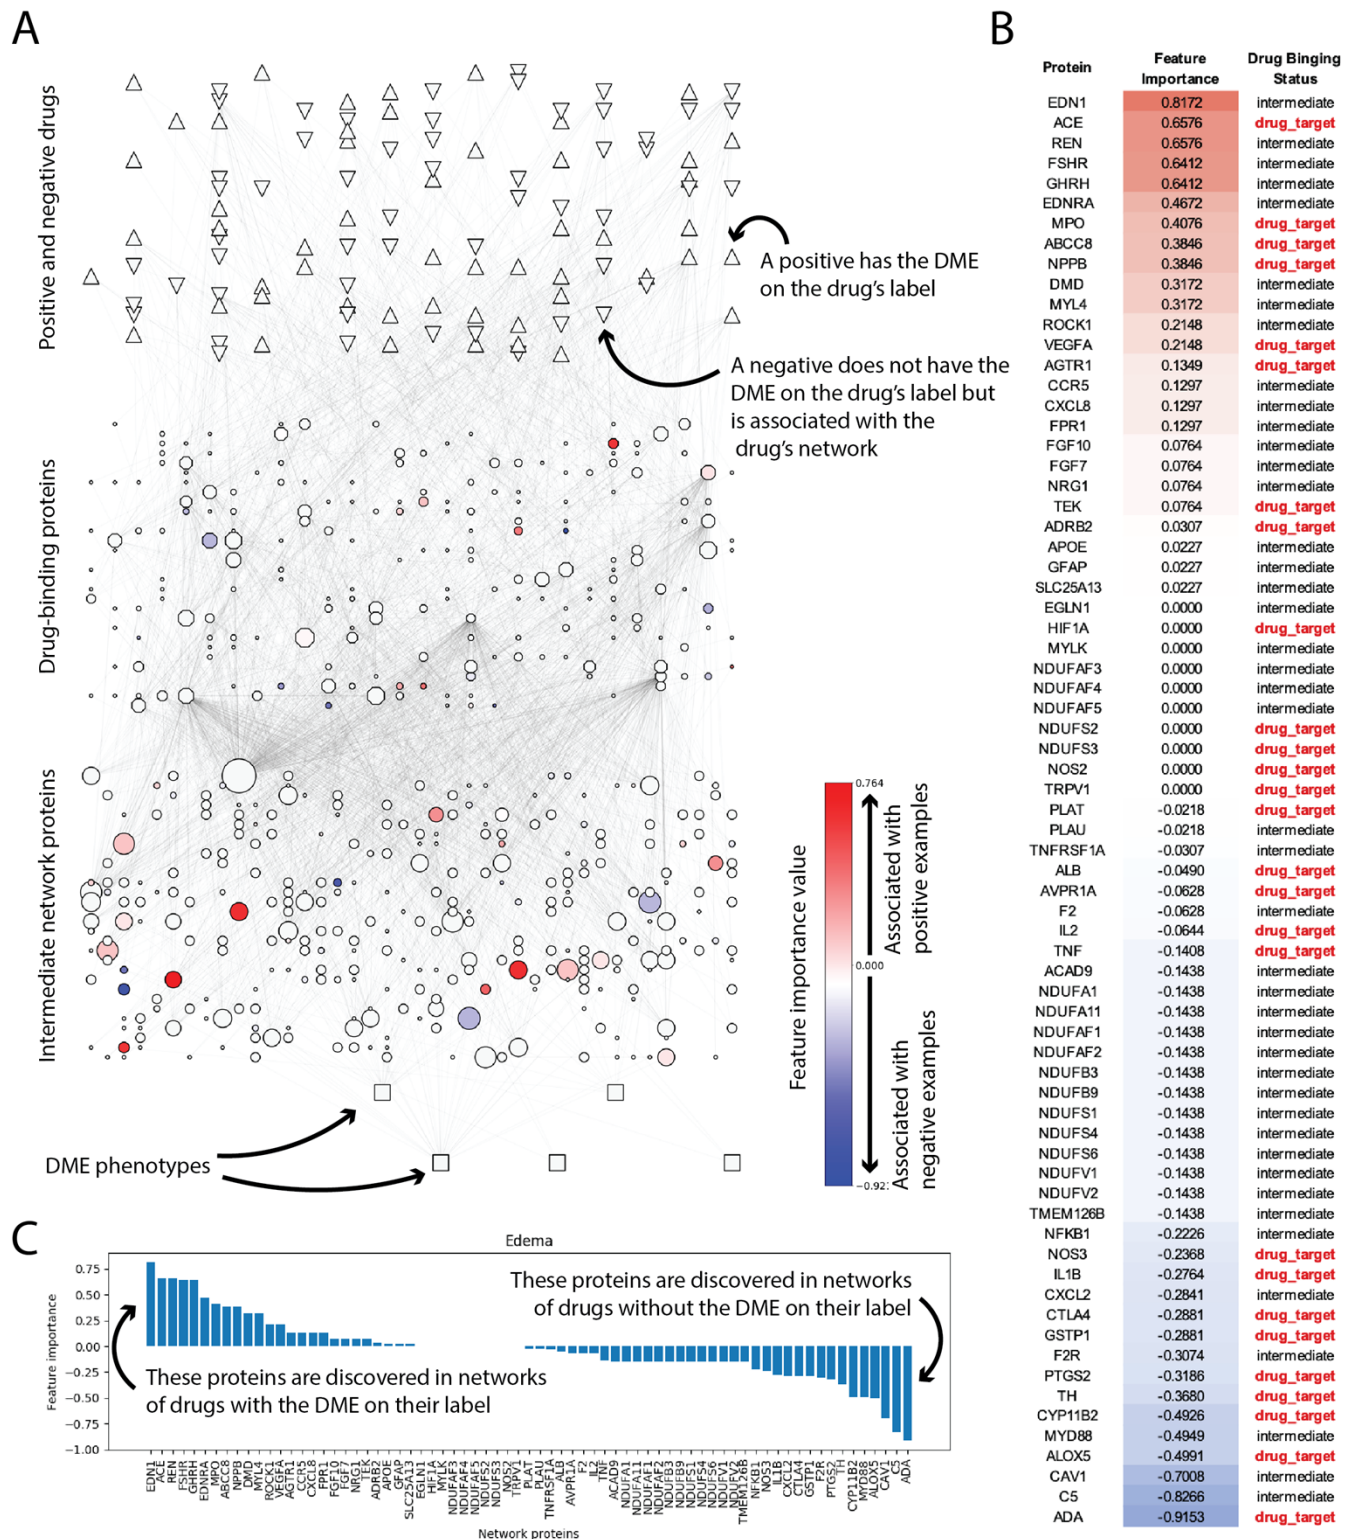

339

340

341

342

343

**Figure 2. Meta-analysis of DME-associated networks identifies CSIs for edema.** The merged interaction network for all true and false positive drugs associated with edema highlights which network components – drug-binding and network proteins – have high feature importance in the logistic regression model (A). True/false positive drugs are represented in the top layer as regular/inverted triangles respectively. Drug-

344 binding and intermediate pathway proteins are represented in the second and third layers. The size of the  
345 protein reflects the number of networks in which the protein appears. Relevant edema-associated phenotypes  
346 are represented as boxes in the last layer. Protein coloring reflects the feature importance in the logistic  
347 regression model. Red/blue coloring represents association to true/false positive networks. We have also  
348 provided tabular results (**B**) indicating protein feature importance score and whether or not the protein is drug-  
349 binding and a histogram (**C**) of ranked feature importance scores.

350

351
